# Supplementary material for: Tea and Chicory Extract Characterization, Classification and Authentication by Non-Targeted HPLC-UV-FLD Fingerprinting and Chemometrics
Source: MDPI journal article supplement (doi:10.3390/foods10122935), 2021-11-28
Supplement: s1 [file s1]

## Supplementary Material

# Tea and Chicory Extract Characterization, Classification and Authentication by non-Targeted HPLC-UV-FLD Fingerprinting and Chemometrics

Josep Pons <sup>1</sup>, Àlex Bedmar <sup>1</sup>, Nerea Núñez <sup>1</sup>, Javier Saurina <sup>1,2</sup> and Oscar Núñez <sup>1,2,\*</sup>

<sup>1</sup> Department of Chemical Engineering and Analytical Chemistry, University of Barcelona. Martí i Franquès 1-11, E08028, Barcelona, Spain. (J.P., josepferre8@gmail.com, À.B., alexbedmar1999@gmail.com, N.N., nereant7@gmail.com, J.S., xavi.saurina@ub.edu; O.N., oscar.nunez@ub.edu)

<sup>2</sup> Research Institute in Food Nutrition and Food Safety, University of Barcelona, Recinte Torribera, Av. Prat de la Riba 171, Edifici de Recerca (Gaudí), Santa Coloma de Gramenet, E08921 Barcelona, Spain.

\* Correspondence: O.N.: oscar.nunez@ub.edu

**Table S1.** Information about the analyzed samples.

| Sample type | Commercial name                                        | Production region | Number of samples<br>(different lots) |
|-------------|--------------------------------------------------------|-------------------|---------------------------------------|
| Black tea   | Ceylon black tea                                       | Sri Lanka         | 3                                     |
|             | Irish blend                                            | India             | 3                                     |
|             | Strong English breakfast                               | Sri Lanka         | 3                                     |
|             | Yunnan finest tippy,<br>premium                        | China             | 2                                     |
|             | India Assam maud                                       | India             | 3                                     |
|             | Kenya Marnyin                                          | Kenya             | 3                                     |
|             | Darjeeling ringtong (second<br>harvest)                | India             | 3                                     |
|             | Darjeeling first flush (first<br>harvest)              | India             | 2                                     |
|             | Formosa tarry lapsang<br>souchong                      | Taiwan            | 3                                     |
|             | Ceylon quality blend                                   | Sri Lanka         | 2                                     |
|             | Ceylon Nuwara eliya                                    | Sri Lanka         | 3                                     |
|             | Korakundah mountain tea                                | India             | 3                                     |
|             | Darjelling margaret's hope<br>(first harvest, premium) | India             | 2                                     |
| Green tea   | Organic gunpowder                                      | China             | 2                                     |
|             | Pi lo chun (premium)                                   | Taiwan            | 2                                     |
|             | Sencha (Zhejiang)                                      | China             | 2                                     |
|             | Lung ching                                             | China             | 2                                     |
|             | Sencha (premium)                                       | China             | 2                                     |
|             | Japan Bancha premium                                   | Japan             | 2                                     |
|             | Japan gyokuro organic                                  | Japan             | 2                                     |
|             | Mao Feng Jiangsu                                       | China             | 2                                     |
|             | Assam Jamguri green                                    | India             | 2                                     |
|             | Lung ching second grade<br>premium                     | China             | 2                                     |
| Oolong tea  | Dong ding oolong                                       | Taiwan            | 3                                     |

|           |                                                |         |   |
|-----------|------------------------------------------------|---------|---|
|           | Tie kuan yin                                   | China   | 3 |
|           | Milky oolong                                   | China   | 2 |
|           | Special yellow sun                             | China   | 2 |
| Red tea   | Pu erh Royal (special fermentation)            | China   | 3 |
|           | Pu erh Original                                | China   | 3 |
|           | Pu erh Imperial (manual harvesting)            | China   | 3 |
|           | Pu erh Royal Palace                            | China   | 3 |
| White tea | Pai Mu tan                                     | China   | 5 |
|           | Silver needles (premium, artisanal production) | China   | 5 |
| Chicory   | Chicory roots, Valley of Tea                   | Belgium | 5 |
|           | Ecological chicory, Herbes del Molí            | Spain   | 5 |
|           | Chicory roots, Health Embassy                  | England | 5 |
|           | Chicory roots, Especies Pedroza                | Spain   | 5 |

**Table S2.** PLS model and prediction classification rates in the tea extract vs. chicory adulteration studies.

| Adulteration study     | HPLC-UV fingerprint |                | HPLC-FLD fingerprint |                |
|------------------------|---------------------|----------------|----------------------|----------------|
|                        | PLS model           | PLS prediction | PLS model            | PLS prediction |
| Black tea vs. chicory  | 100%                | 100%           | 100%                 | 100%           |
| White tea vs. chicory  | 100%                | 77.78%         | 100%                 | 100%           |
| Green tea vs. chicory  | 100%                | 100%           | 96.43%               | 100%           |
| Oolong tea vs. chicory | 100%                | 88.89%         | 100%                 | 100%           |
| Red tea vs. chicory    | 100%                | 100%           | 94.45%               | 100%           |
